# Supplementary material for: A mesoporous silica-supported CeO2/cellulose cathode catalyst for efficient bioelectrochemical reduction of inorganic carbon to biofuels
Source: Royal Society of Chemistry journal article supplement (doi:10.1039/d1re00166c), 2021-01-01
Supplement: d1re00166c1.pdf [file d1re00166c1.pdf]

# **Mesoporous silica supported $\text{CeO}_2$ /Cellulose cathode catalyst for effective microbial electro reduction of inorganic carbon to biofuels**

Dayakar Thatikayala<sup>1</sup>, Deepak Pant<sup>2</sup>, and Booki Min<sup>1\*</sup>

<sup>1</sup>Department of Environmental science and Engineering, Kyung Hee University, Yongin,  
Republic of Korea

<sup>2</sup>Seperation and Conversion Technology, Flemish institute for technological Research  
(VITO), Boeretang 200, 2400 Mol, Belgium

**\*Corresponding author, Email: bkmin@khu.ac.kr**

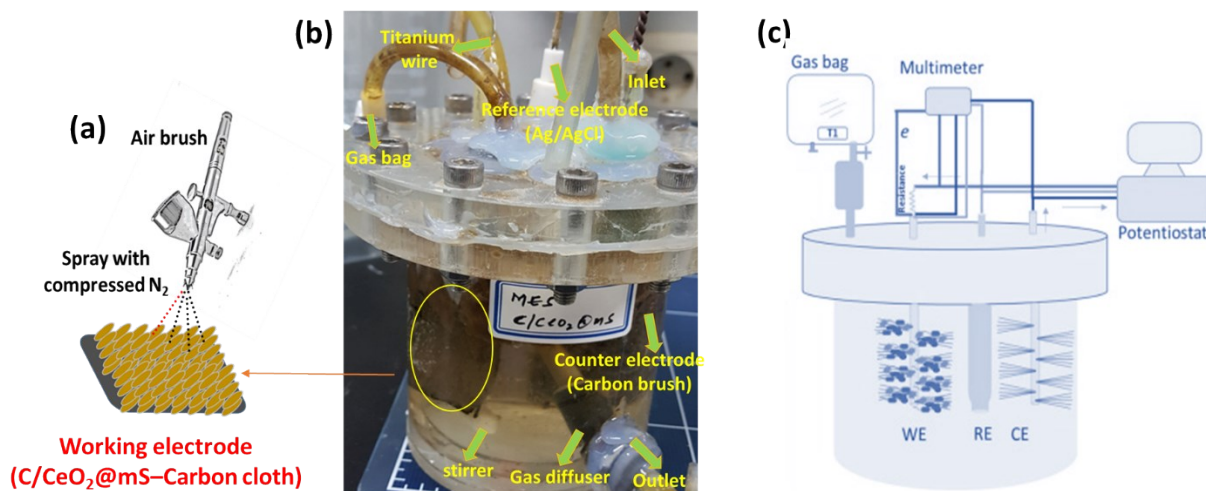

Fig. S1 (a) Coating of catalyst ink over carbon cloth with air brush (b) Image of MES reactor (c) MES control operation diagram
